# Supplementary material for: Advanced prostate cancer management by urologist: a real-life national survey in Brazil
Source: Research Square preprint supplement (doi:10.21203/rs.3.rs-5197321/v1), 2024-10-23
Supplement: Supplementary file 1 [file 369453bfbcc3d88719e4a90e.docx]

Supplementary Table 1 - Demographic data and management differences between different regions of Brazil

|  | North | Northeast | Central-west | Southeast | Sao Paulo | South |  |
| --- | --- | --- | --- | --- | --- | --- | --- |
| During residency | | | | | | | |
| Managed metastatic pts | 18 (69.2) | 66 (68.8) | 22 (78.6) | 54 (77) | 115 (71.5) | 109 (73.2) | <0.001 |
| Prescribed LHRHa | 12 (46.2) | 37 (38.5) | 17 (60.7) | 32 (44.4) | 109 (67.7) | 94 (63.1) | <0.001 |
| Prescribed 1st Gen. antiandrogens | 15 (57.7) | 43 (44.8) | 19 (67.9) | 40 (55.6) | 114 (70.8) | 95 (63.8) | <0.001 |
| Prescribed ARPi | 2 (7.7) | 8 (8.3) | 3 (10.7) | 15 (20.8) | 30 (18.6) | 13 (8.7) | 0.07 |
| Prescribed Chemo | - | 4 (4.2) | 3 (10.7) | 5 (6.9) | 11 (6.8) | 6 (4) | 0.37 |
| Barriers to prescribe LHRHa | | | | | | | |
| Concerning only about drug’s clinical use | 4 (21.1) | 31 (47.1) | 5 (22.7) | 12 (23.1) | 14 (11.9) | 25 (22.1) | <0.001 |
| Access and regulatory barriers only | 14 (73.7) | 43 (65.2) | 13 (59.1) | 29 (55.6) | 42 (35.6) | 49 (43.4) | <0.001 |
| Both limitations | 4 (21.1) | 21 (31.8) | 4 (18.2) | 7 (13.5) | 9 (7.6) | 13 (11.5) | <0.001 |
| Barriers do prescribe ARPi | | | | | | | |
| Concerning only about drug’s clinical use | 1 (3.8) | 17 (17.7) | 3 (10.7) | 9 (12.5) | 12 (7.5) | 11 (7.4) | 0.79 |
| Access and regulatory barriers only | 7 (26.9) | 21 (21.9) | 5 (17.9) | 15 (20.8) | 30 (18.6) | 32 (21.5) | 0.15 |
| Both limitations | 6 (23.1) | 21 (21.9) | 11 (39.3) | 11 (15.3) | 34 (21.1) | 36 (24.2) | 0.39 |

*ADT neoadjuvant, concurrent and/or adjuvant to radiotherapy.

Supplementary Table 2 – Demographic data and management differences between general urologists and uro-oncologists

|  | General urologist  395 (80.6) | Uro-oncologist  95 (19.4) | p value |
| --- | --- | --- | --- |
| Barriers to prescribe LHRH, n (%) | | | |
| Concerning only about drug’s clinical use | 75 (25.3) | 12 (15.8) | 0.08 |
| Access and regulatory barriers only | 154 (51.9) | 30 (39.5) | 0.054 |
| Both limitations | 50 (16.8) | 6 (7.9) | 0.052 |
| A total of 215/373 respondents (57.6% of the valid percentage) reported experiencing clinical or structural LHRHa access difficulties. | 179 (60.3) | 36 (47.4) | 0.04 |
| Barriers do prescribe ARPi, n (%) | | | |
| Concerning only about drug’s clinical use | 147 (63.1) | 23 (50) | 0.09 |
| Access and regulatory barriers only | 184 (79) | 36 (78.3) | 0.91 |
| Both limitations | 99 (42.5) | 14 (30.4) | 0.12 |
| A total of 275 respondents (98.6% of the valid percentage) reported experiencing clinical or structural access difficulties to prescribe ARPi. | 230 (8.7) | 45 (97.8) | 0.64 |

Pop: population; y: years; PC: prostate cancer; BCR: biochemical recurrence; LHRHa: luteinizing hormone-releasing hormone agonist; ARPi: androgen receptor pathway inhibitor; ADT: androgen deprivation therapy; RT: radiation therapy; m0: non-metastatic; CRPC: castration-resistant prostate cancer.
