# Supplementary material for: Advanced prostate cancer management by urologist: a real-life national survey in Brazil
Source: Research Square preprint supplement (doi:10.21203/rs.3.rs-5197321/v1), 2024-10-23
Supplement: Supplementary file 2 [file 6888be4942fd7d3e67c2113d.docx]

Table 1 - Demographic data and management differences between different regions of Brazil

|  | North | Northeast | Central-west | Southeast | Sao Paulo | South |  |
| --- | --- | --- | --- | --- | --- | --- | --- |
| Urooncologist, N (%) | 2 (7.7) | 16 (16.7) | 6 (21.4) | 16 (22.2) | 36 (22.4) | 21 (14.1) | 0.21 |
| City pop.> 500.000 hab | 21 (80.8) | 68 (70.8) | 22 (78.6) | 47 (65.3) | 103 (64) | 58 (38.9) | <0.001 |
| Female urologists | 4 (15.4) | 12 (12.6) | 1 (3.6) | 4 (5.6) | 11 (6.8) | 6 (4) | 0.07 |
| Employment sector |  |  |  |  |  |  | 0.31 |
| Public | 2 (7.7) | 17 (17.7) | 3 (10.7) | 4 (5.6) | 20 (12.4) | 14 (9.4) |  |
| Mainly public | 13 (50) | 22 (22.9) | 6 (21.4) | 21 (29.2) | 47 (29.2) | 36 (24.2) |  |
| Mainly private | 6 (32.1) | 35 (36.5) | 6 (21.4) | 21 (29.2) | 40 (24.8) | 53 (35.6) |  |
| Private | 4 (15.4) | 18 (18.8) | 12 (42.9) | 22 (30.6) | 48 (29.8) | 42 (28.2) |  |
| Experience > 10y practice | 16 (61.5) | 55 (57.3) | 20 (71.5) | 54 (67.2) | 106 (65.8) | 100 (67.2) | 0.17 |
| Current practice |  |  |  |  |  |  |  |
| Consults >10 PCa Pts./month | 9 (34.6) | 27 (28.1) | 11 (39.3) | 30 (41.7) | 49 (30.4) | 37 (24.8) | 0.18 |
| Consults ≥ 2 BCR Pts./month | 2 (7.7) | 4 (4.2) | 4 (14.3) | 10 (13.9) | 13 (8.1) | 8 (5.4) |  |
| Attending metastatic pts | 15 (57.7) | 53 (55.2) | 14 (50) | 44 (61.1) | 91 (56.7) | 90 (60.4) |  |
| Performs bilat orchiectomy | 18 (78.5) | 59 (74.7) | 18 (69.2) | 43 (67.2) | 90 (63.8) | 94 (72.1) | 0.51 |
| Prescribe LHRHa | 5 (19.2) | 19 (19.8) | 9 (32.1) | 25 (34.7) | 77 (47.8) | 57 (38.3) |  |
| Prescribe 1st Gen. antiandrogens | 8 (30.8) | 25 (26) | 9 (32.1) | 25 (34.7) | 46 (30.9) | 69 (42.9) |  |
| Prescribe ARPi | 2 (7.7) | 12 (12.5) | 2 (7.1) | 20 (27.8) | 37 (23) | 31 (20.8) | 0.04 |
| Prescribe Chemo | - | 5 (5.2) | - | 7 (9.7) | 8 (5) | 5 (3.4) | 0.17 |
| Localized PCa decision-made by Urologist / Oncologist / Board N(%) | 23 (88.5)/-/- | 75 (78.1) / 3 (3.1) / 1(1) | 23 (82.1) / - / 3 (10.7) | 57 (79.2) / 2 (2.8) / 5 (6.9) | 130 (80.7) / 4 (2.5) / 4 (4.3) | 123 (82.6) / 2 (1.3) / 7 (4.7) | <0.001 |
| PCa high risk 10y survival expectancy (prefer radical prostatectomy) | 23 (100) | 77 (97.5) | 26 (100) | 61 (95.3) | 139 (98.6) | 129 (97.7) | 0.63 |
| Radiotherapy - decision on ADT not shared by the urologist | 5 (19.2) | 19 (19.8) | 8 (28.6) | 15 (20.8) | 45 (27.9) | 51 (34.3) | 0.15 |
| Prescribes ADT* for radiotherapy | 6 (23) | 8 (8.3) | 5 (17.9) | 7 (9.7) | 36 (22.4) | 31 (20.8) | 0.04 |
| Post-radiot. follow-up does not involve urologist | 2 (7.6) | 12 (12.5) | 4 (14.3) | 8 (11.2) | 18 (11.2) | 12 (7.9) | 0.78 |
| No PET-PSMA available in BCR | 20 (76.9) | 35 (36.5) | 10 (35.7) | 27 (37.5) | 54 (33.5) | 46 (30.9) | <0.001 |
| ≥ 50% Pts study w/ PET-PSMA on BCR | 4 (15.4) | 20 (20.9) | 13 (46.5) | 9 (26.4) | 49 (30.4) | 40 (20.2) | 0.01 |
| ADT decision in m0 CRPC involves urologist | 22 (84.6) | 63 (65.7) | 21 (75) | 61 (84.7) | 116 (72) | 103 (75.8) | <0.001 |

* - ADT neoadjuvant, concurrent and/or adjuvant to radiotherapy.

Table 2 – Demographic data and management differences between general urologists and uro-oncologists

|  | General urologist  395 (80.6) | Uro-oncologist  95 (19.4) |  |
| --- | --- | --- | --- |
| City pop.> 500.000 inhabitants, n (%) | 226 (57.2) | 80 (84.2) | <0.001 |
| Female, n (%) | 34 (8.3) | 2 (2.1) | <0.001 |
| Employment sector, n (%) |  |  | 0.03 |
| Public | 32 (8.1) | 14 (14.7) |  |
| Mainly public | 110 (27.8) | 34 (35.8) |  |
| Mainly private | 136 (34.4) | 21 (22.1) |  |
| Private | 117 (29.6) | 26 (27.4) |  |
| Experience > 10y practice, n (%) | 284 (71.9) | 55 (57.9) | 0.01 |
| Current practice, n (%)* |  |  |  |
| Consults >10 PC patients/month | 92 (25.8) | 63 (73.3) | <0.001 |
| Consults ≥ 2 BCR Pts./month | 53 (14.8) | 45 (52.3) | <0.001 |
| Attending metastatic pts | 222 (73.8) | 72 (84.7) | 0.03 |
| Performs bilat orchiectomy | 243 (68.1) | 67 (77.9) | 0.07 |
| Prescribe LHRHa | 133 (32.2) | 48 (49.5) | 0.006 |
| Prescribe 1st generation antiandrogens | 135 (34) | 40 (46.5) | 0.02 |
| Prescribe ARPi | 63 (17.6) | 37 (43) | <0.001 |
| Prescribe Chemo | 16 (4.5) | 9 (10.5) | 0.03 |
| Radical prostatectomy as preferred treatment for PC high risk 10y life expectancy, n (%) | 348 (97.5) | 86 (100) | 0.28 |
| Decision on ADT associated with RT does not share by the urologist, n (%) | 113 (31.7) | 26 (30.2) | 0.79 |
| Prescribes ADT* for RT, n (%) | 77 (18.6) | 37 (38.1) | <0.001 |
| Post-RT follow-up does not involve urologist, n (%) | 47 (13.2) | 4 (4.7) | 0.04 |
| No PSMA/PET available in BCR, n (%) | 150 (42.1) | 23 (26.7) | 0.009 |
| ADT decision in m0 CRPC involves urologist, n (%) | 60 (16.8) | 5 (5.8) | 0.005 |

Pop: population; y: years; PC: prostate cancer; BCR: biochemical recurrence; LHRHa: luteinizing hormone-releasing hormone agonist; ARPi: androgen receptor pathway inhibitor; ADT: androgen deprivation therapy; RT: radiation therapy; m0: non-metastatic; CRPC: castration-resistant prostate cancer. * - valid percentage.

Table 3 - Barriers pointed on LHRH and ARPi prescription.

| LHRH agonists | | | | |
| --- | --- | --- | --- | --- |
|  | Prescribe | No prescribe | Refers | Total |
| no issues | 160 (28.7) |  |  | 160 (28.7) |
| no APC* |  | 7 (1.3) | 54 (9.7) | 61 (11) |
| Concerning only about drug’s clinical use | 1 (0.2) | 12 (2.2) | 20 (3.6) | 33 (6) |
| Access and regulatory barriers only | 7 (1.3) | 104 (18.4) | 21 (3.8) | 132 (23.5) |
| Both limitations | 2 (0.4) | 54 (9.7) | 2 (0.4) | 58 (10.5) |
| Total | 170 (30.5) | 177 (31.7) | 97 (17.4) |  |
| ARPi | | | | |
|  | Prescribe | No prescribe | Refers | Total |
| no issues | 4 (0.7) |  | 5 (0.9) | 9 (1.6) |
| Localized disease only |  | 7 (1.3) | 73 (13.1) | 80 (14.4) |
| Concerning only about drug’s clinical use | 3 (0.5) | 36 (6.5) | 17 (3) | 56 (10) |
| Access and regulatory barriers only | 2 (0.4) | 103 (18.4) | 7 (1.3) | 112 (20.1) |
| Both limitations | 2 (0.4) | 97 (17.4) | 22 (3.9) | 121 (21.7) |
| Total | 11 (3) | 243 (43.6) | 124 (21.2) |  |

* - does not consult Advanced Prostate Cancer (APC)
